# Supplementary material
Source: publisher site journal article supplement (https://www.spandidos-publications.com/8584/downloadSupplementary)

Figure S1. Immunohistochemical results of invasive breast carcinoma (August 2025). (A) Tumor cells show negative expression of androgen receptor (AR) (original magnification, x100; scale bar, 100  $\mu$ m). (B) Tumor cells showed a Ki-67 proliferation index of ~70%. Arrows indicate nuclear positivity in tumor cells (original magnification, x200; scale bar, 100  $\mu$ m). (C) Tumor cells show negative expression of cytokeratin 5/6 (CK5/6) (original magnification, x200; scale bar, 200  $\mu$ m). (D) Tumor cells show strong (3+) membranous expression of E-cadherin. Arrows indicate membranous positivity in tumor cells (original magnification, x200; scale bar, 100  $\mu$ m). (E) Tumor cells exhibit strong (3+) membranous positivity of p120. Arrows indicate membranous positivity in tumor cells (original magnification, x200; scale bar, 100  $\mu$ m). (F) Tumor cells show negative expression of epidermal growth factor receptor (EGFR) (original magnification, x200; scale bar, 100  $\mu$ m). (G) Tumor cells show negative expression of SOX10 (original magnification, x200; scale bar, 100  $\mu$ m). (H) Tumor cells show negative expression of p40 (original magnification, x200; scale bar, 100  $\mu$ m). (I) Tumor cells show strong (3+) positivity of trichorhinophalangeal syndrome 1 (TRPS1). Arrows indicate positivity in tumor cells (original magnification, x200; scale bar, 100  $\mu$ m). (J) D2-40 staining clearly highlights vascular endothelium, and intravascular tumor emboli are visible. Arrows indicate intravascular tumor emboli (original magnification, x200; scale bar, 100  $\mu$ m). (K) Tumor cells show negative expression of p63 (original magnification, x200; scale bar, 100  $\mu$ m).

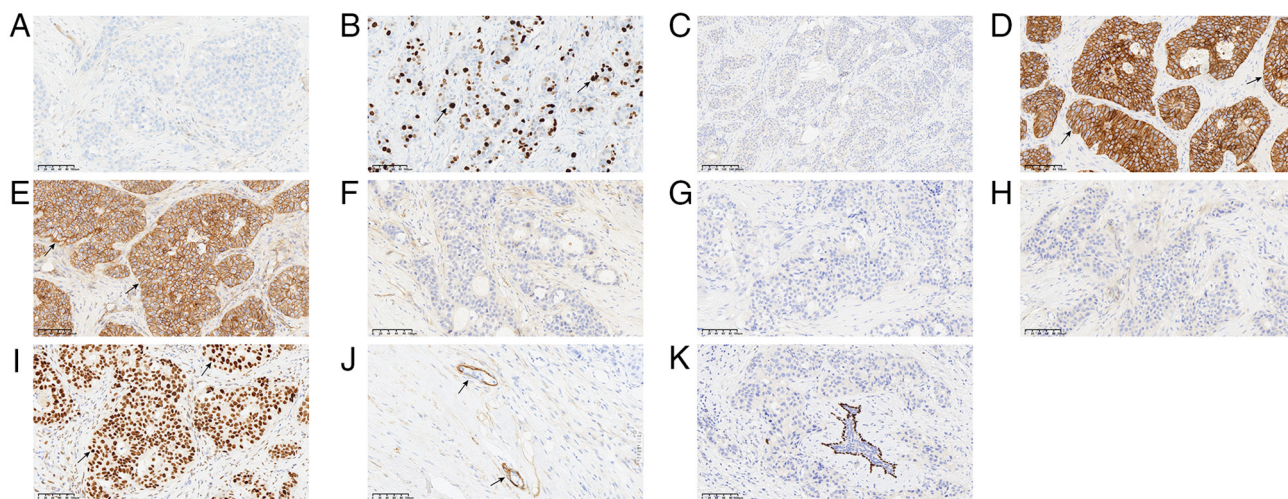

Supplement: Supplementary file 1 [file downloadSupplementary]
